# Supplementary material for: Field and laboratory evaluation of a high time resolution x-ray fluorescence instrument for determining the elemental composition of ambient aerosols
Source: Copernicus journal article supplement (doi:10.5194/amt-2017-363), 2017-12-14
Supplement: Supplementary file 1 [file amt-2017-363-supplement.pdf]

*Supplement of*

**Field and laboratory evaluation of the XACT<sup>®</sup> 625 ambient continuous multi-metal monitor**

5

Anja H. Tremper et al.

Correspondence to: Anja H. Tremper ([anja.tremper@kcl.ac.uk](mailto:anja.tremper@kcl.ac.uk))

**S1. Map of the United Kingdom with sample location**

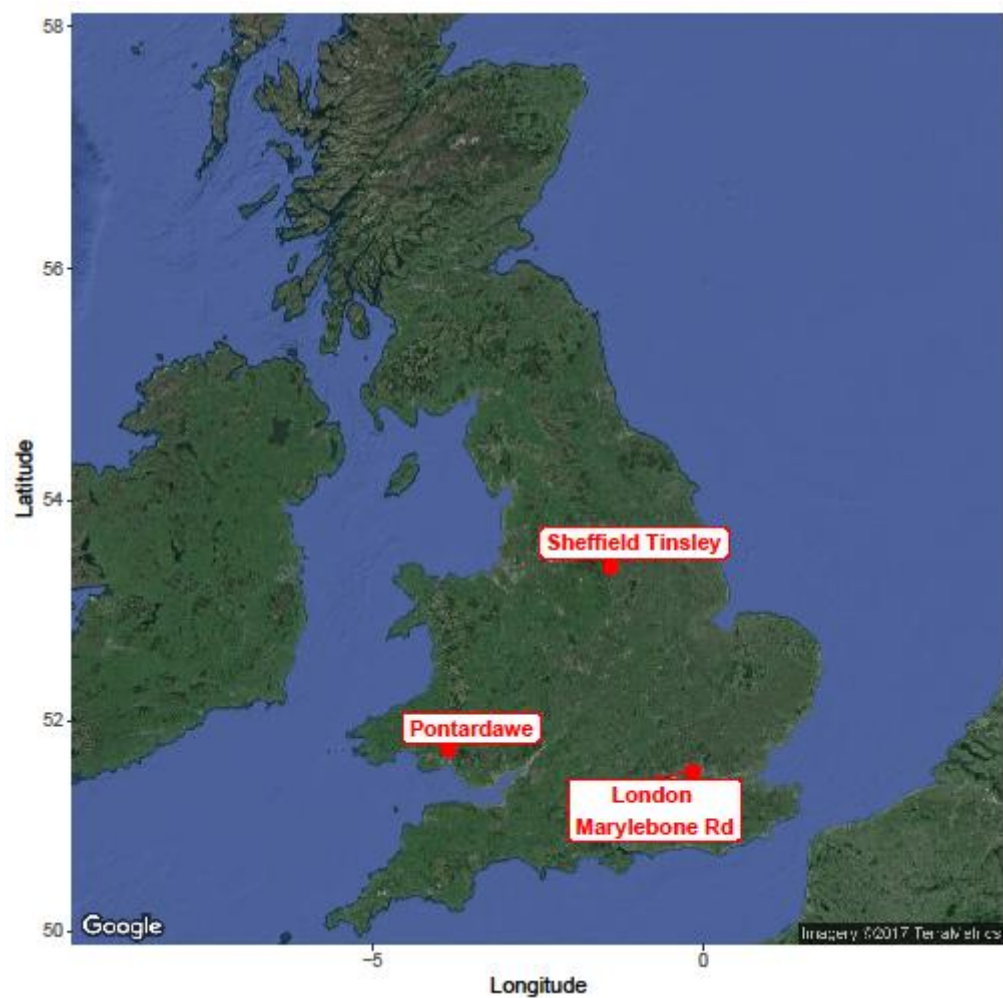

**Figure S1: Sample locations in the field experiments**

## S2. Deming Regression graphs of full range of tested aerosol concentrations measured with XACT and calculated from TEOM measurements

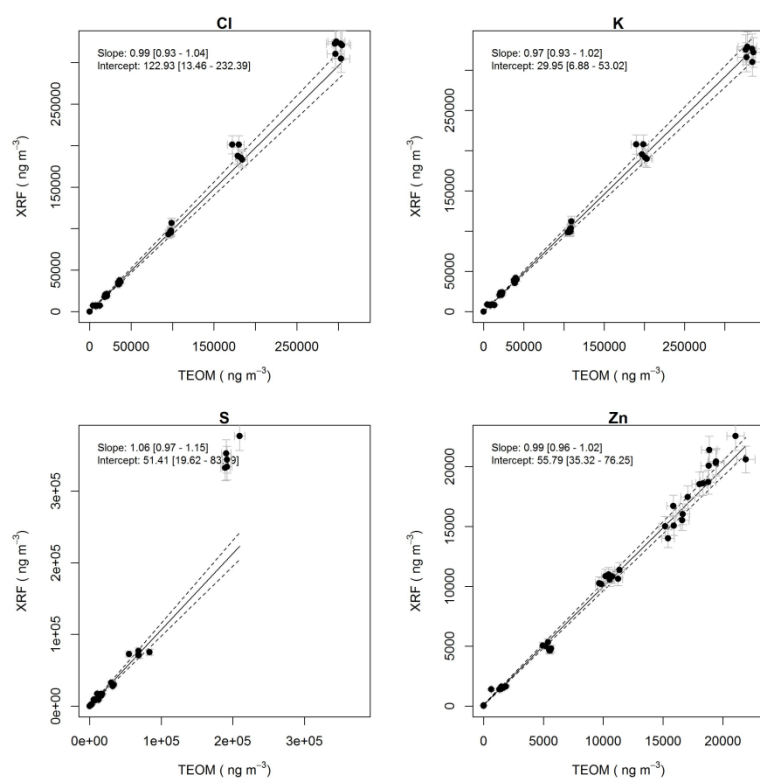

Figure S2: Deming regression of full range of tested aerosols; Cl (top left), K (top right), S (bottom left) and Zn (bottom right) mass concentrations measured with the XACT and calculated from TEOM mass measurements

### S3. Deming regression graphs for all elements compared by XACT and ICP-MS

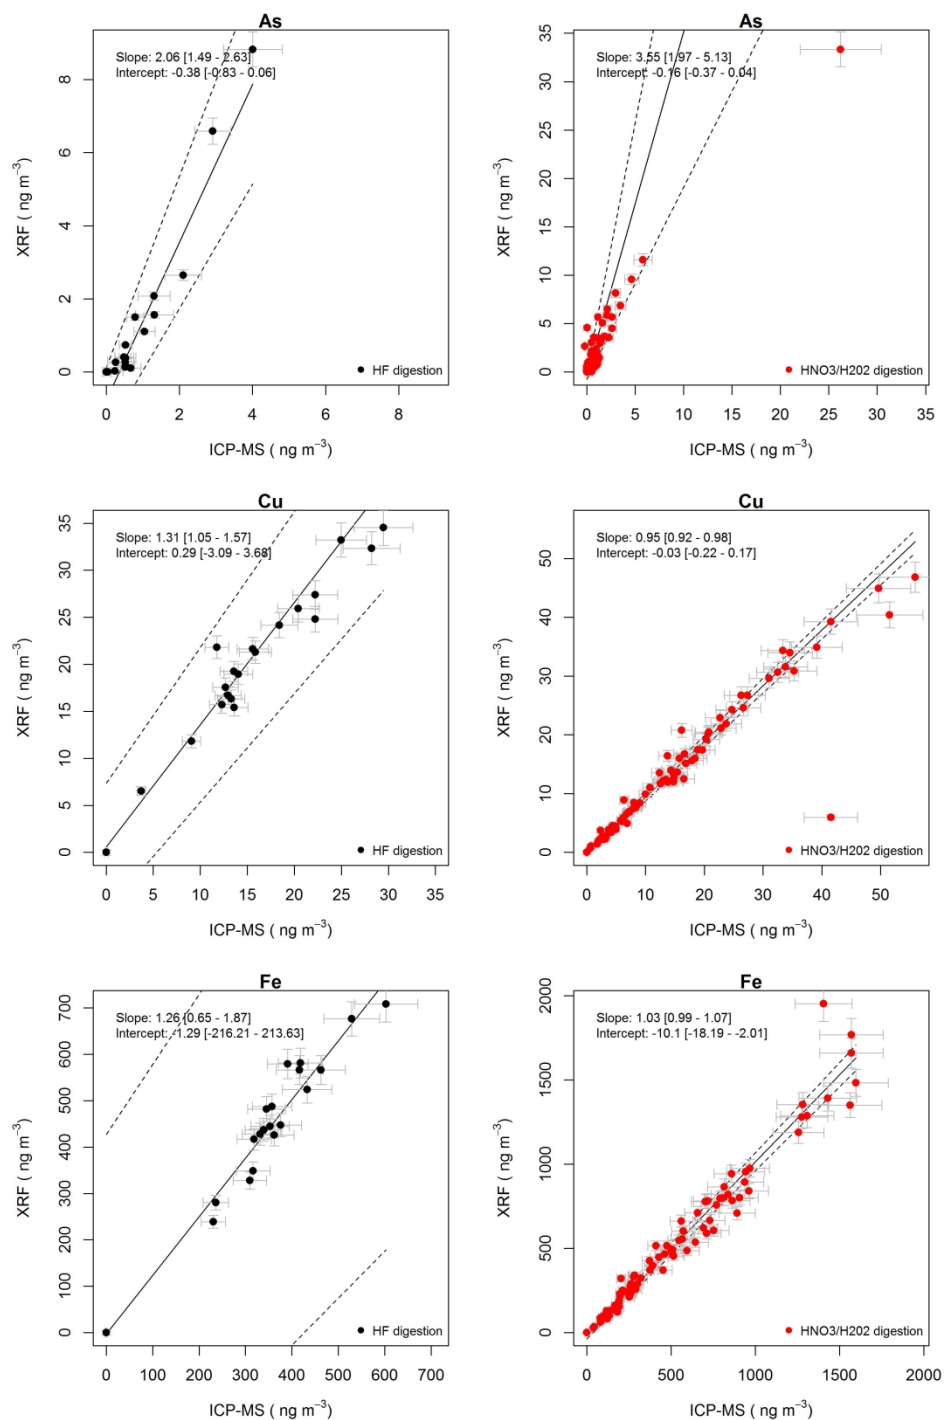

Figure S3: Deming regression of As, Cu and Fe as measured by ICP-MS (split into HF/HClO<sub>4</sub> (left) and HNO<sub>3</sub>/H<sub>2</sub>O<sub>2</sub> (right)) and XACT (ng m<sup>-3</sup>)

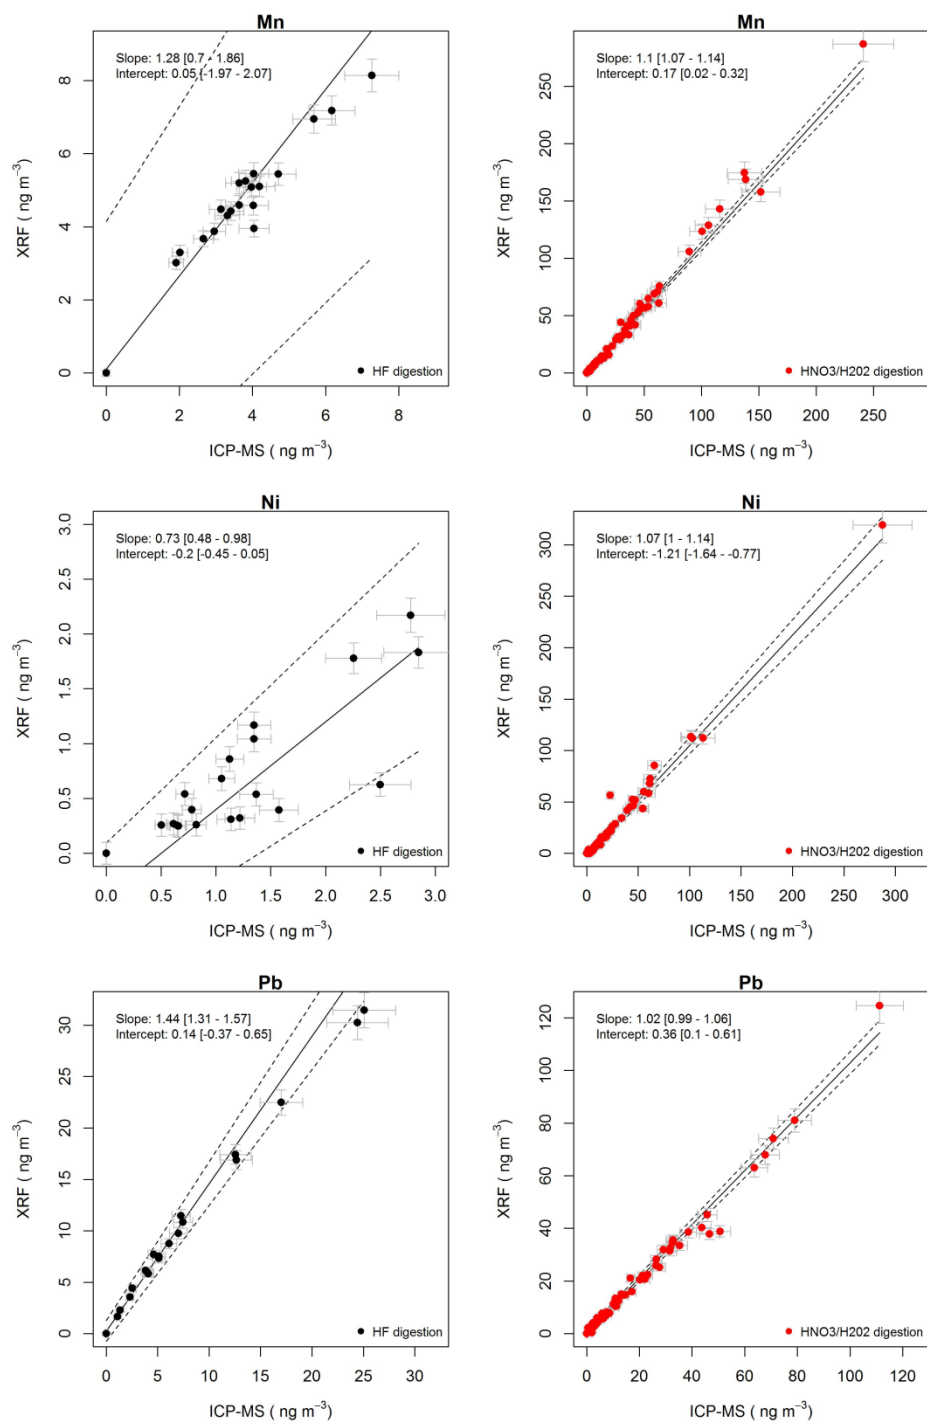

Figure S4: Deming regression of Mn, Ni, Pb as measured by ICP-MS (split into HF/HClO<sub>4</sub> (left) and HNO<sub>3</sub>/H<sub>2</sub>O<sub>2</sub> (right)) and XACT (ng m<sup>-3</sup>)

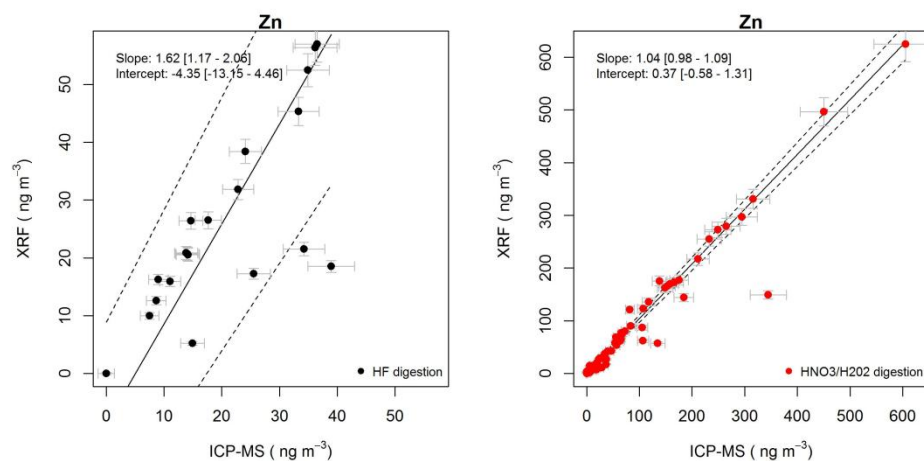

**Figure S5: Deming regression of Zn as measured by ICP-MS (split into HF/HClO<sub>4</sub> (left) and HNO<sub>3</sub>/H<sub>2</sub>O<sub>2</sub> (right)) and XACT (ng m<sup>-3</sup>)**

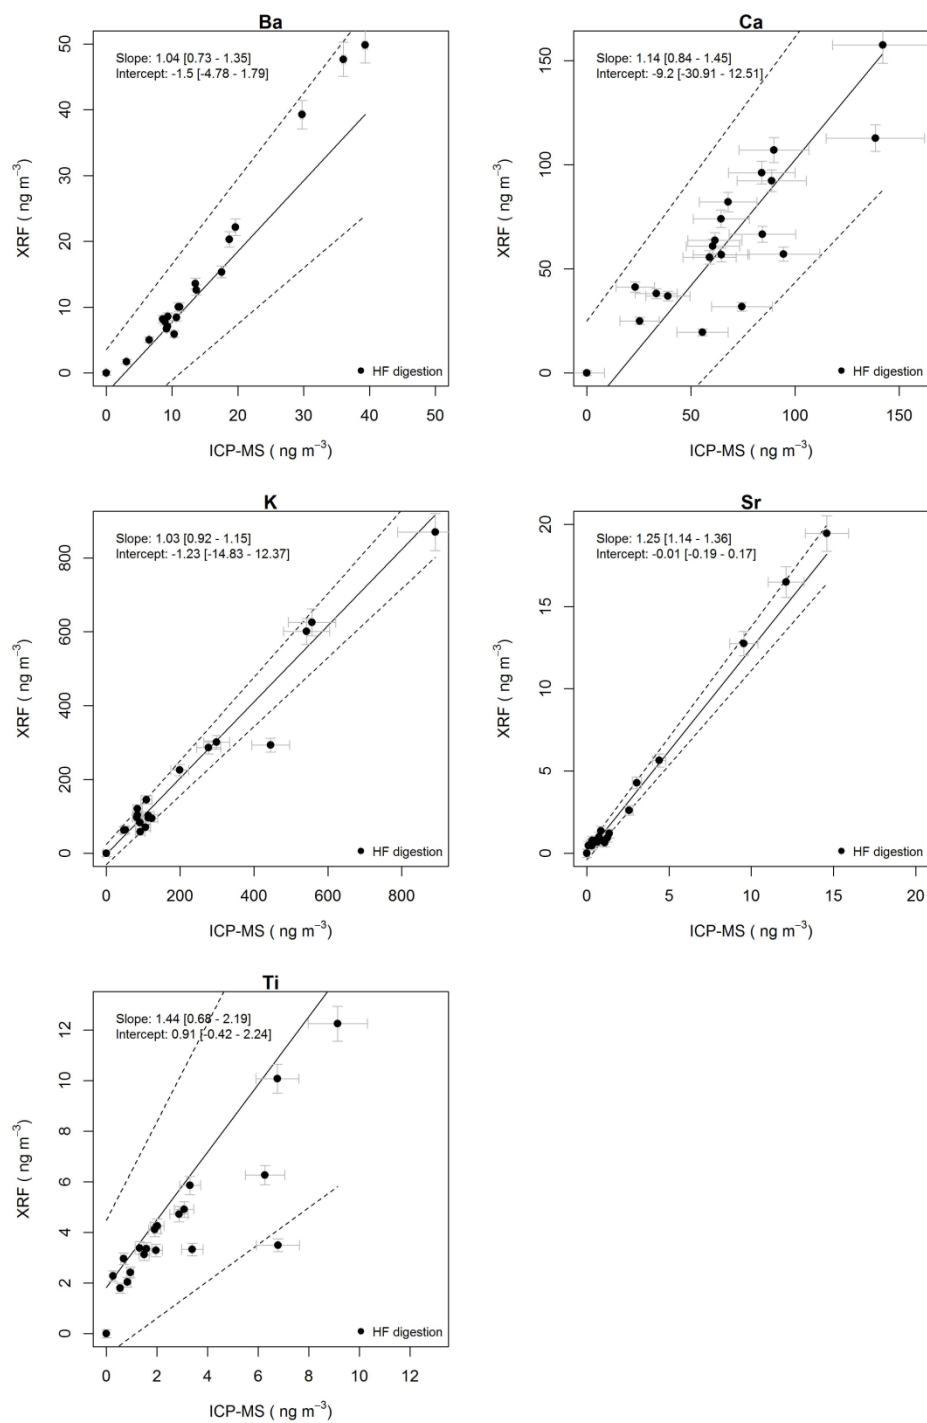

Figure S6: Deming regression of Ba, Ca, K, Sr and Ti as measured by ICP-MS (HF/HClO<sub>4</sub> only) and XACT (ng m<sup>-3</sup>)

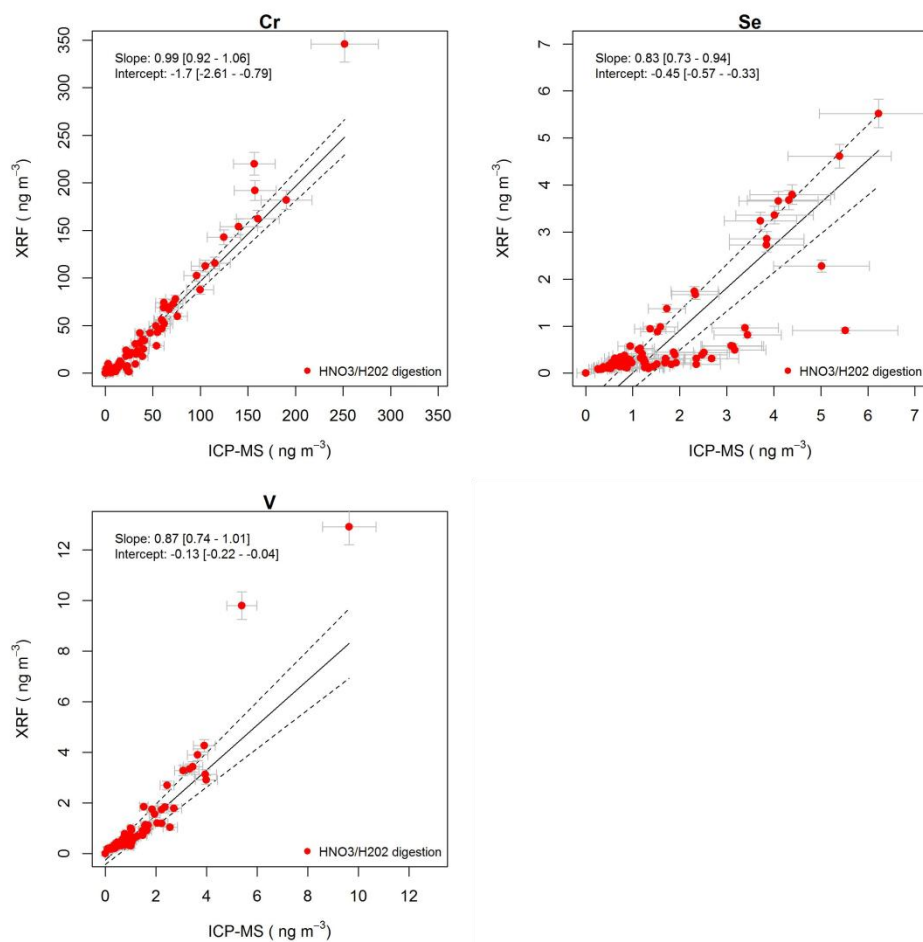

Figure S7: Deming regression of Cr, Se and V as measured by ICP-MS (HNO<sub>3</sub>/H<sub>2</sub>O<sub>2</sub> only) and XACT (ng m<sup>-3</sup>)



#### S4. Deming regression graphs for all elements compared by XACT and XACT (filter)

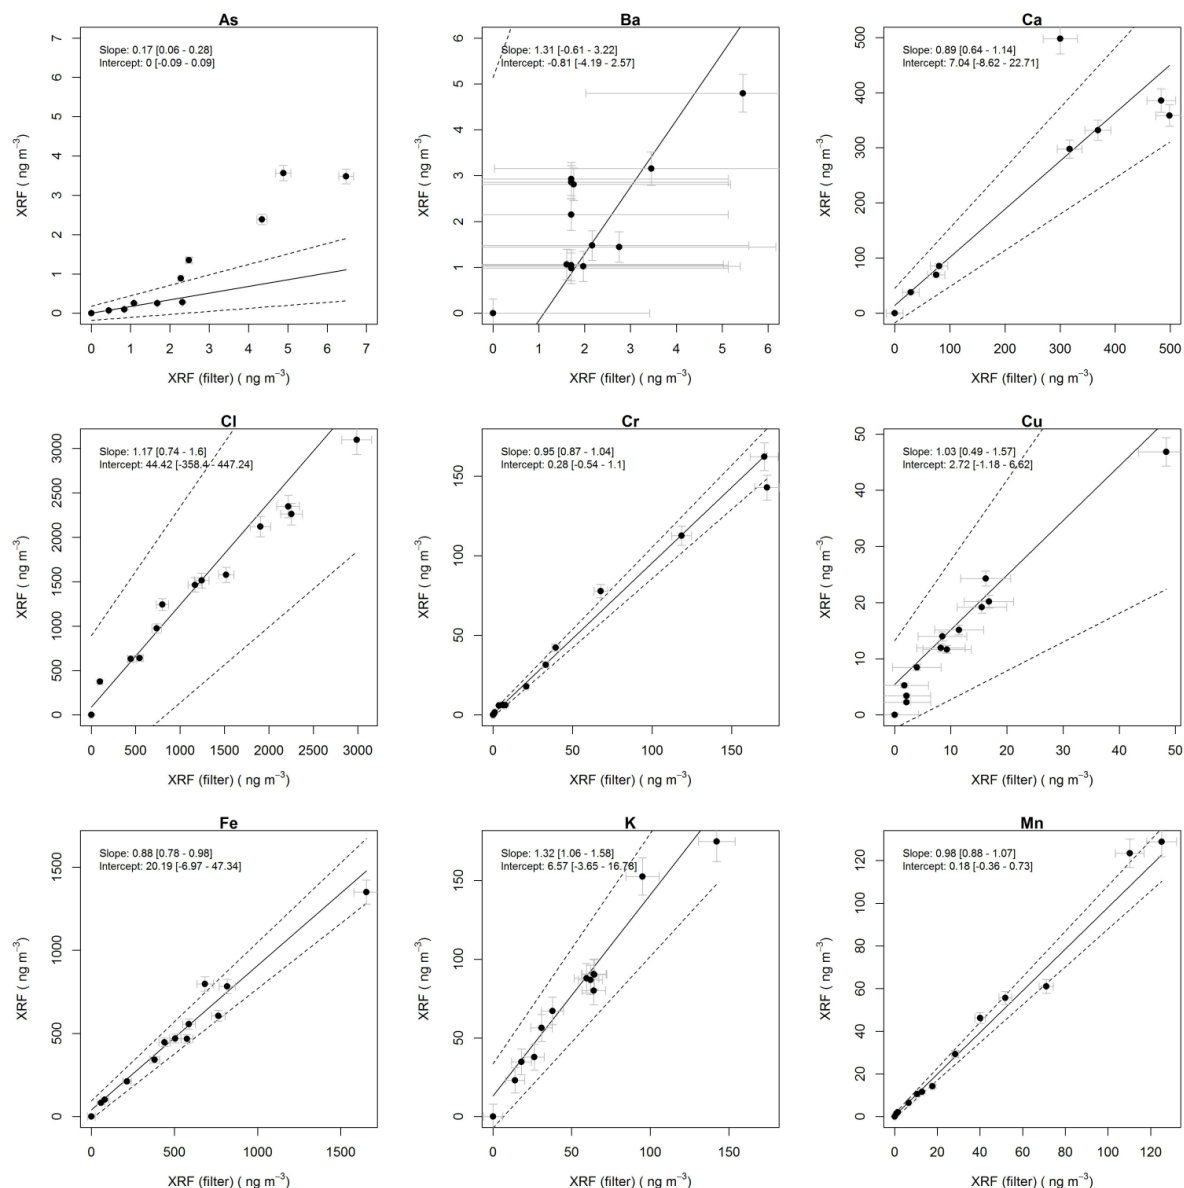

Figure S8: Deming regression of As, Ba, Ca, Cl, Cr, Cu, Fe, K and Mn as measured by XACT (filter) and XACT (in-situ) ( $\text{ng m}^{-3}$ )

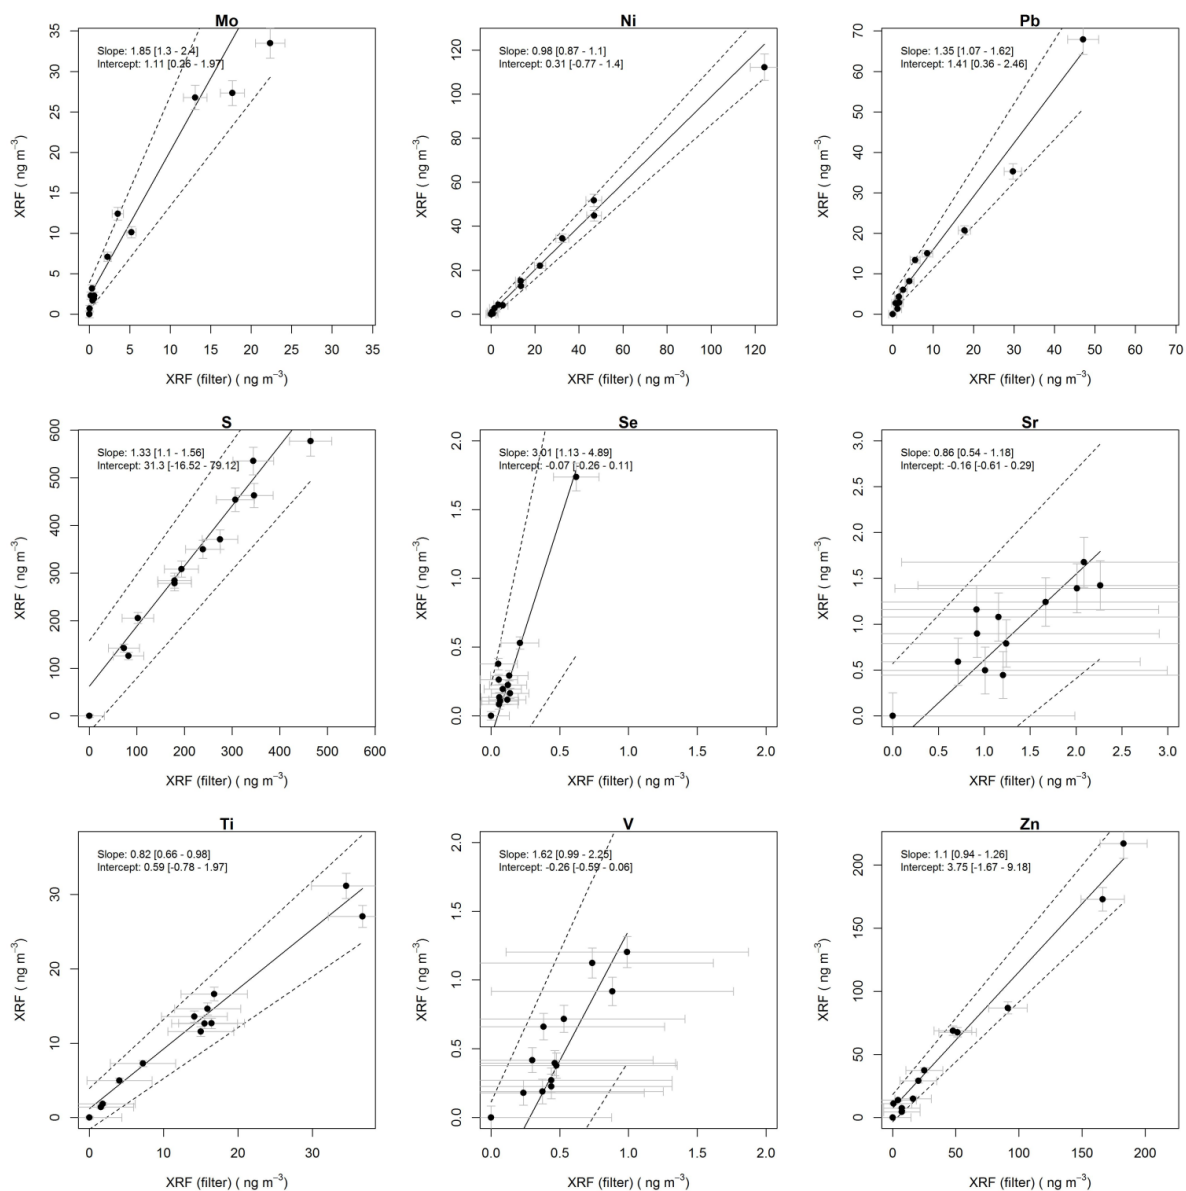

**Figure S9: Deming regression of Mo, Ni, Pb, S, Se, Sr, Ti, V and Zn as measured by XACT (filter) and XACT (in-situ) (ng m<sup>-3</sup>)**

**Table S1: Deming regression results and coefficient of determination for XACT comparison XACT (filter)**

| Element | Slope            | Intercept          | R <sup>2</sup> |
|---------|------------------|--------------------|----------------|
| As      | 0.17 (0.06-0.28) | 0 (-0.09-0.09)     | 0.91           |
| Ba      | 1.31 (-0.61-3.2) | -0.81 (-4.2-2.6)   | 0.50           |
| Ca      | 0.89 (0.64-1.14) | 7.0 (-8.6-23)      | 0.98           |
| Cl      | 1.17 (0.74-1.60) | 44 (-360-450)      | 0.98           |
| Cr      | 0.95 (0.87-1.04) | 0.28 (-0.54-1.10)  | 0.99           |
| Cu      | 1.03 (0.49-1.57) | 2.7 (-1.18-6.6)    | 0.96           |
| Fe      | 0.88 (0.78-0.98) | 20 (-7.0-47)       | 0.96           |
| K       | 1.32 (1.06-1.58) | 6.6 (-3.7-17)      | 0.95           |
| Mn      | 0.98 (0.88-1.07) | 0.18 (-0.36-0.73)  | 0.99           |
| Mo      | 1.85 (1.30-2.4)  | 1.11 (0.26-1.97)   | 0.96           |
| Ni      | 0.98 (0.87-1.10) | 0.31 (-0.77-1.40)  | 0.99           |
| Pb      | 1.35 (1.07-1.62) | 1.41 (0.36-2.5)    | 0.98           |
| S       | 1.33 (1.10-1.56) | 31 (-16.5-79)      | 0.96           |
| Se      | 3.0 (1.13-4.9)   | -0.07 (-0.26-0.11) | 0.93           |
| Sr      | 0.86 (0.54-1.18) | -0.16 (-0.61-0.29) | 0.61           |
| Ti      | 0.82 (0.66-0.98) | 0.59 (-0.78-1.97)  | 0.97           |
| V       | 1.62 (0.99-2.3)  | -0.26 (-0.59-0.06) | 0.76           |
| Zn      | 1.10 (0.94-1.26) | 3.8 (-1.67-9.2)    | 0.98           |

**S5. Typical recovery rates for acid digestions****5 Table S2: Recovery rates for available elements, split by digestion method**

| Element | HF/HClO <sub>4</sub> | HNO <sub>3</sub> /H <sub>2</sub> O <sub>2</sub> |
|---------|----------------------|-------------------------------------------------|
| As      |                      | 102%                                            |
| Ca      | 99%                  |                                                 |
| Cr      |                      | 71%                                             |
| Cu      | 91%                  | 97%                                             |
| Fe      | 103%                 | 100%                                            |
| Mn      | 102%                 | 100%                                            |
| Ni      | 87%                  | 93%                                             |
| Pb      | 87%                  | 103%                                            |
| Se      |                      | 98%                                             |
| Sr      | 86%                  |                                                 |
| V       |                      | 88%                                             |
| Zn      | 89%                  | 108%                                            |

**S6. Deming regression of ICP-MS using different digestion methods**

ICP/MS results were compared for the elements, which were available for both digestion methods (As, Cu, Fe, Mn, Ni, Pb and Zn). No simultaneous samples were available for the two digestion methods. In order to compare the two digestion methods and subsequent ICP-MS, the samples were grouped using the XACT element concentration and the resulting concentrations were compared using Deming regression. Uncertainties were estimated using the relationship between the existing concentrations/uncertainties over the concentration

range. ICP-MS results compared well between the two digestion methods with  $R^2$  of 0.99, 0.98, 0.92, 0.96, 0.93, 0.996 and 0.93, for As, Cu, Fe, Mn, Ni, Pb and Zn, respectively. Samples digested with HF/HClO<sub>4</sub> resulted in significantly higher concentration for the element As, but in significantly lower concentration for the elements Cu, Pb and Zn. For the elements Fe, Mn and Ni no significant difference was found.

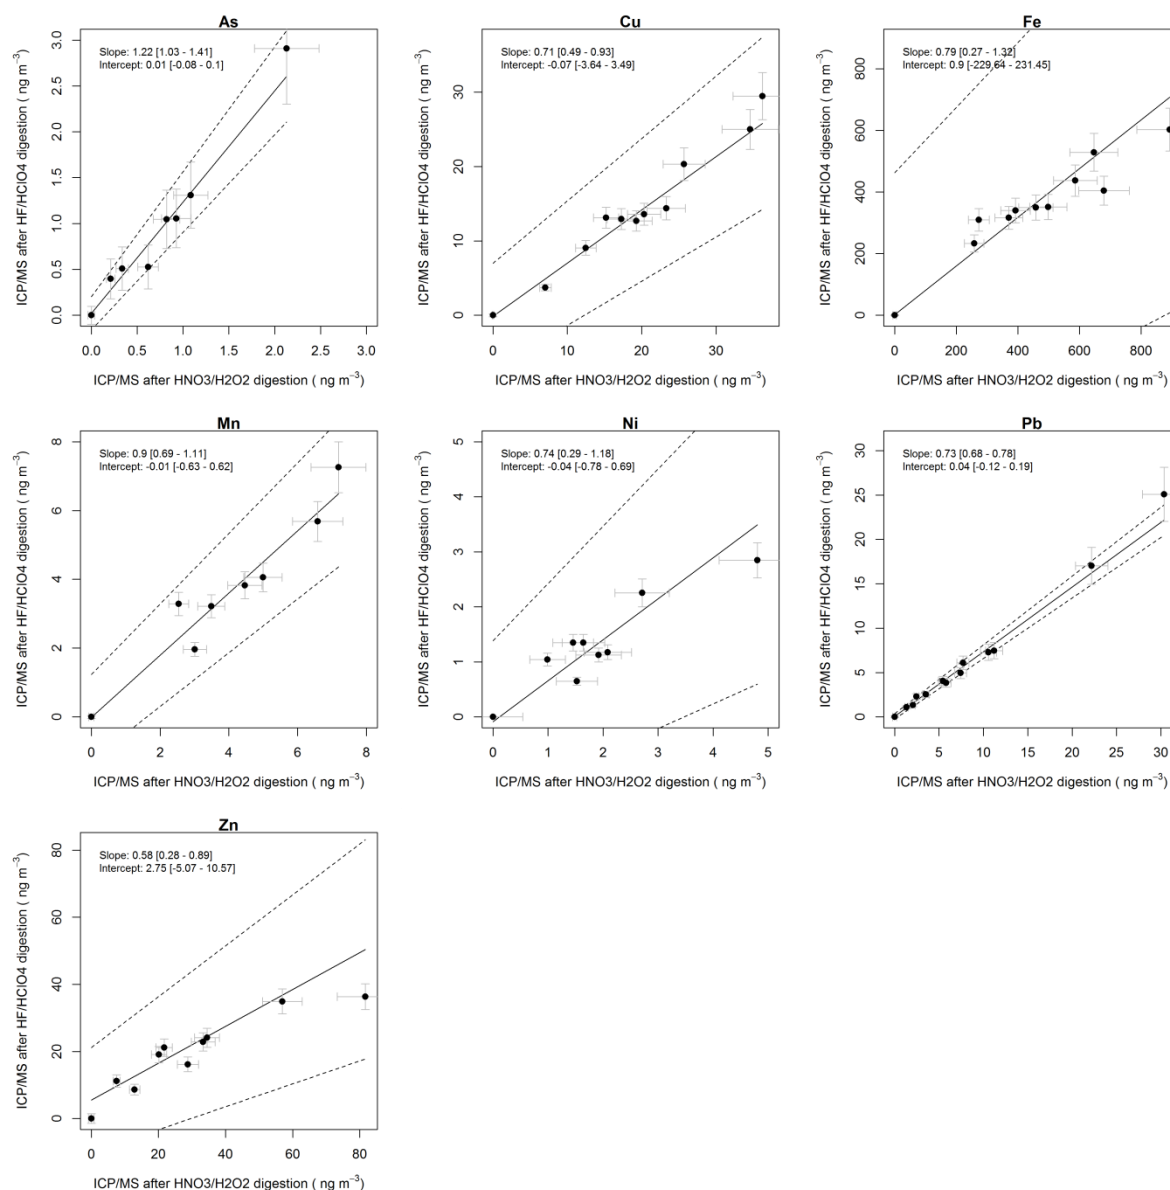

**Figure S10: Deming regression of As, Cu, Fe, Mn, Ni, Pb and Zn as measured by ICP-MS (HNO<sub>3</sub>/H<sub>2</sub>O<sub>2</sub>) and ICP-MS (HF/HClO<sub>4</sub>) (ng m<sup>-3</sup>)**
